# Supplementary material
Source: PubMed Central journal article supplement (PMC8077943)

**Survivors with CAD (2.93)**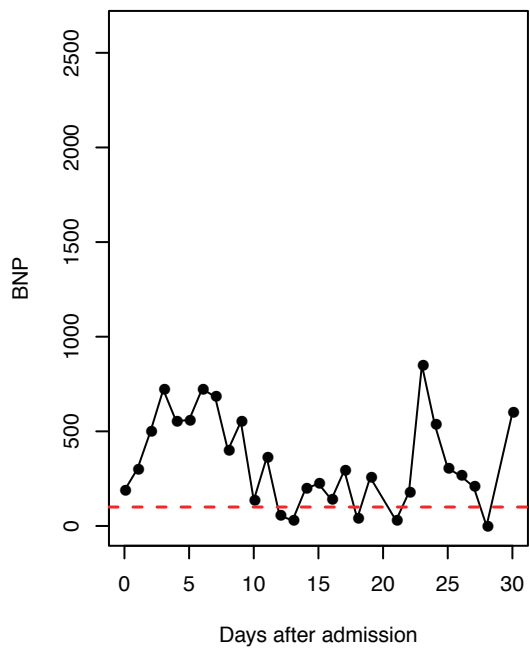**Non-survivors with CAD (4.74)**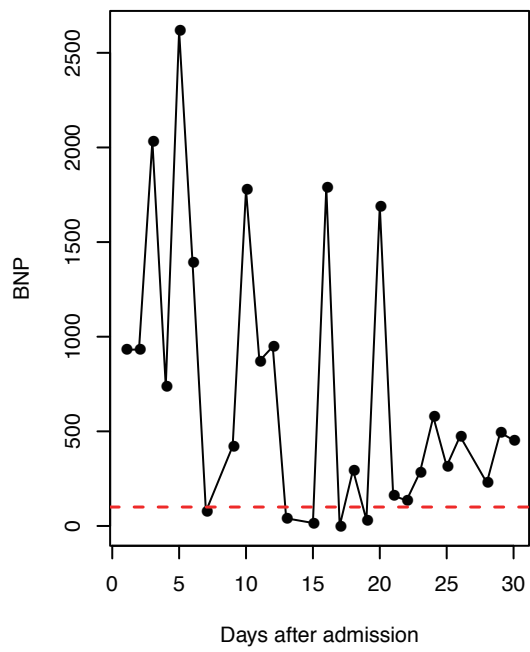**Survivors without CAD (0.742)**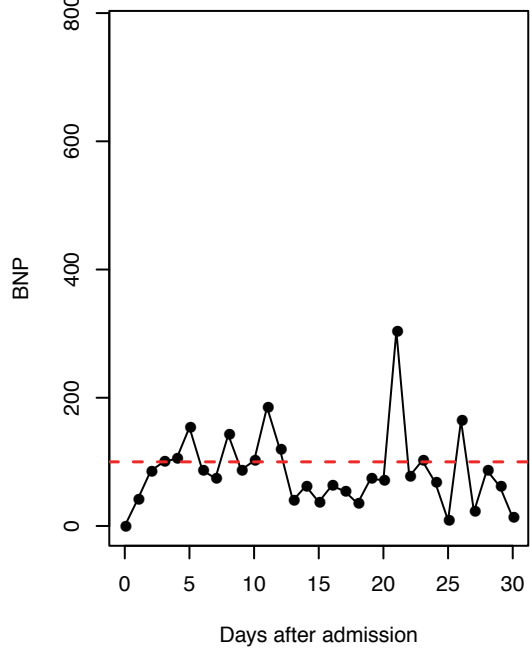**Non-survivors without CAD (2.15)**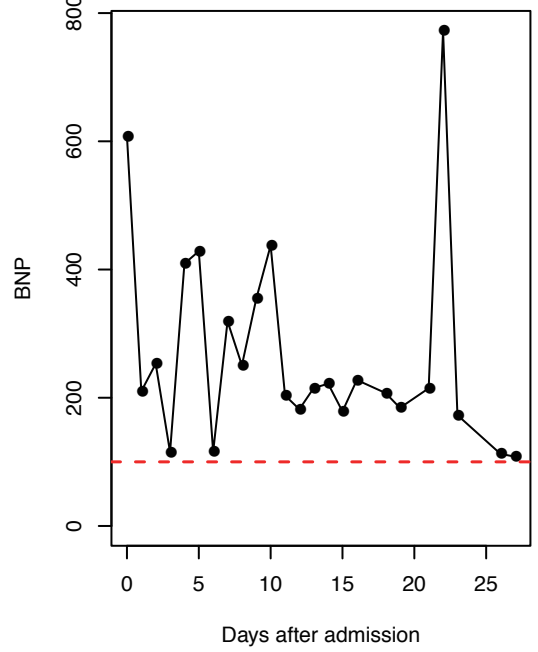**Survivors with CAD (3.79)**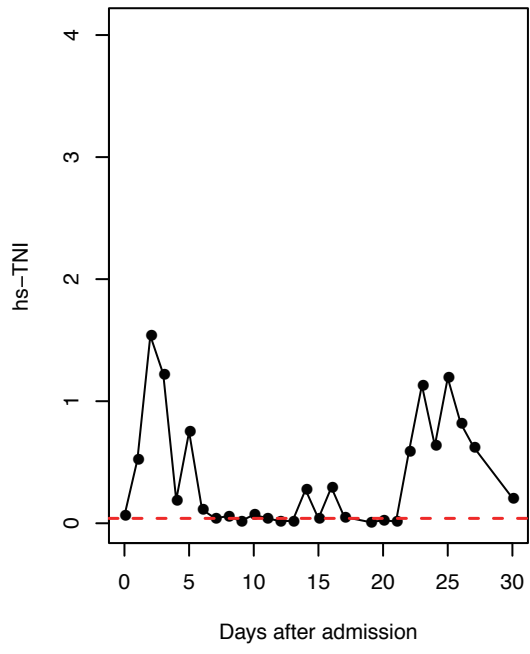**Non-survivors with CAD (1.38)**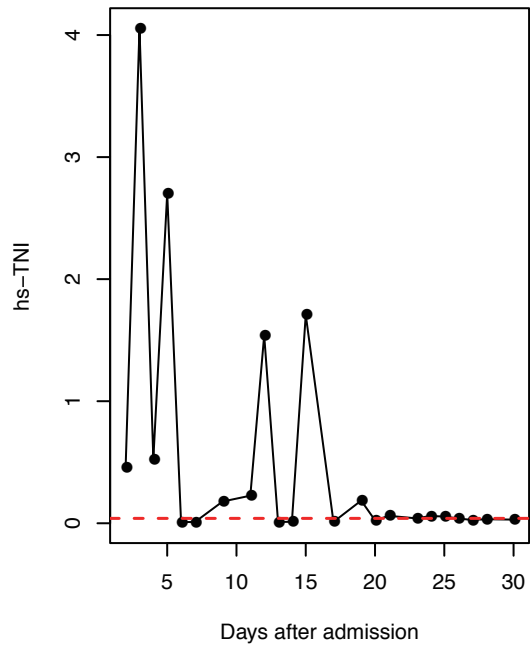**Survivors without CAD (0.329)**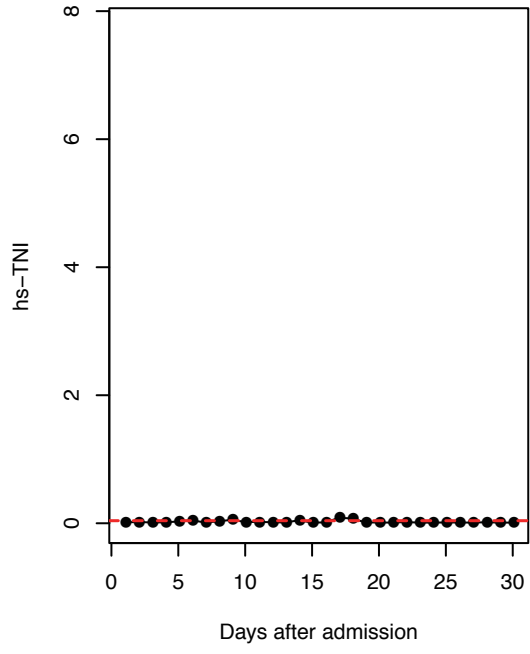**Non-survivors without CAD (6.74)**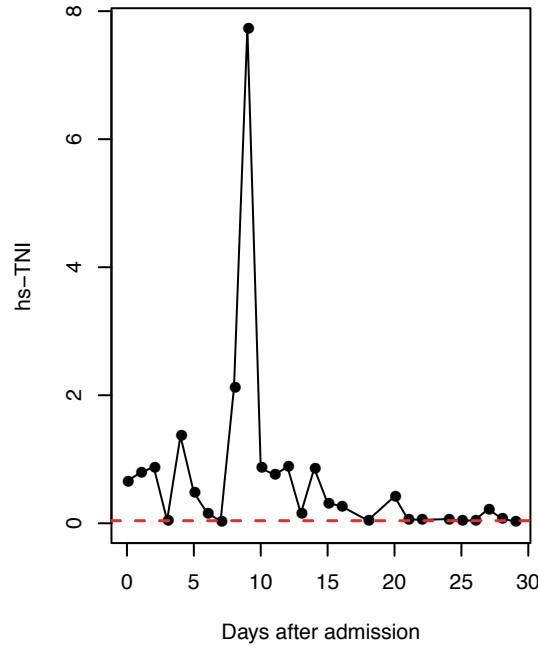**Survivors with CAD (1.02)**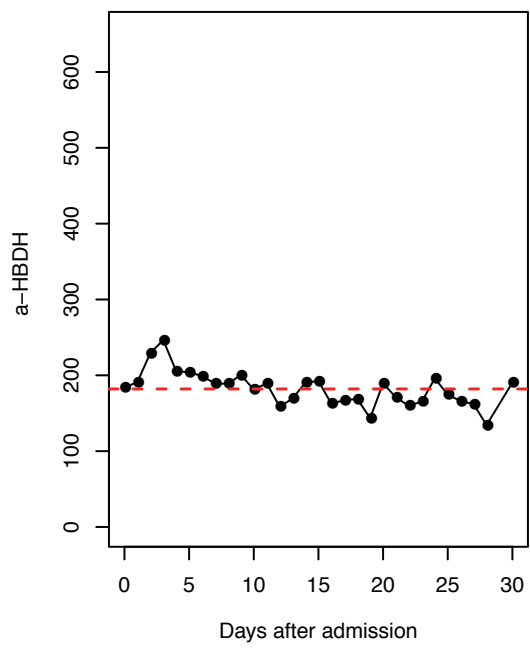**Non-survivors with CAD (1.61)**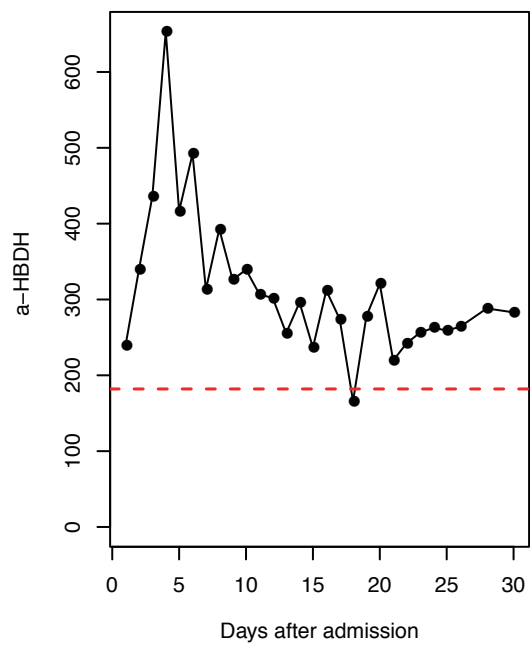**Survivors without CAD (0.939)**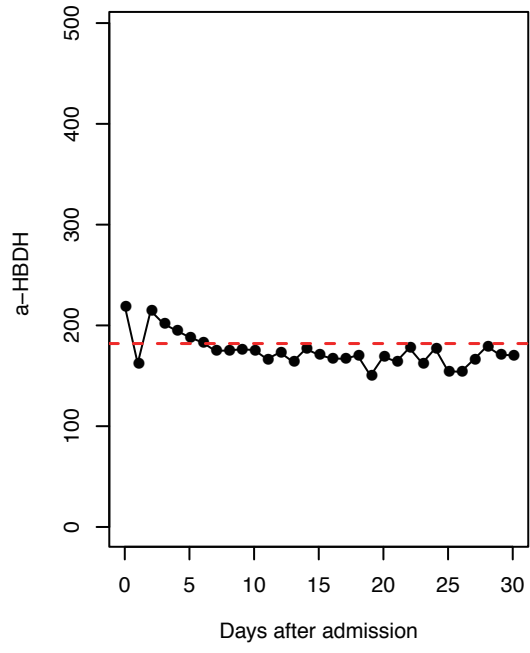**Non-survivors without CAD (2.05)**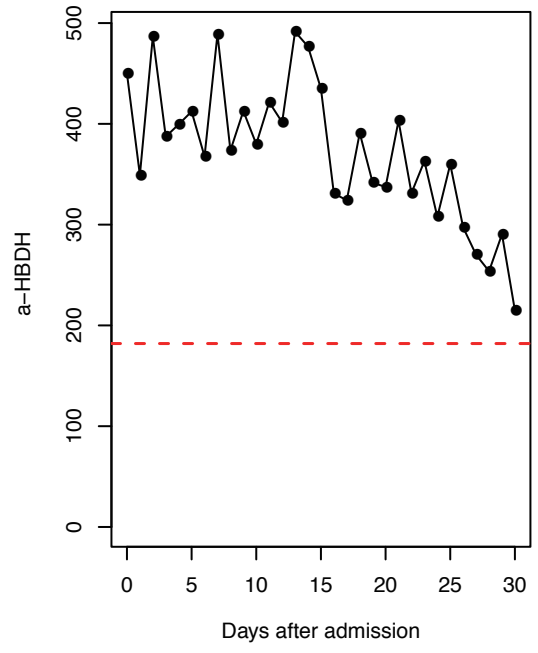**Survivor with CAD (0.426)**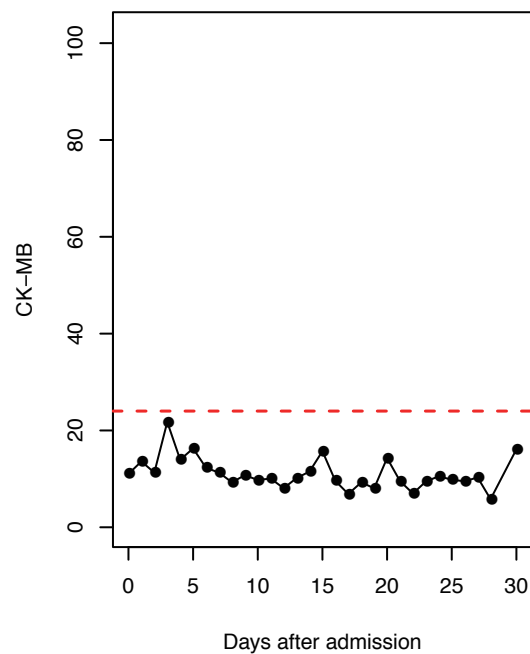**Non-survivors with CAD (0.729)**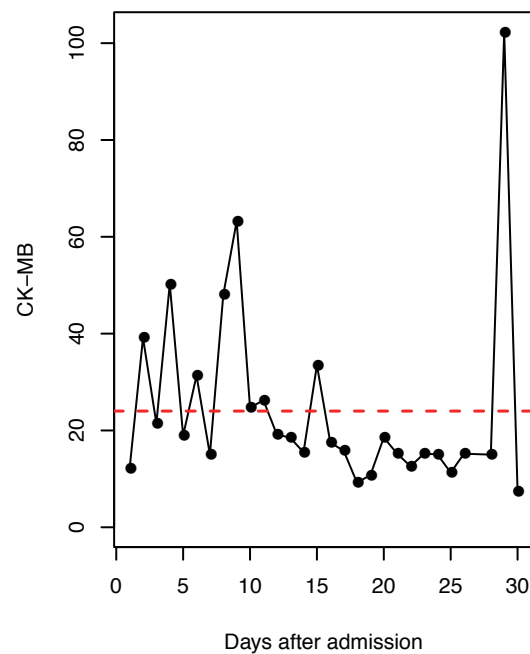**Survivors without CAD (0.423)**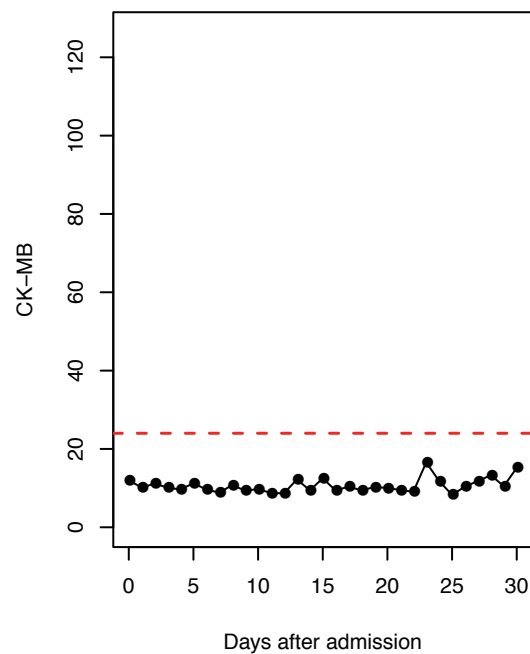**Non-survivors without CAD (1.06)**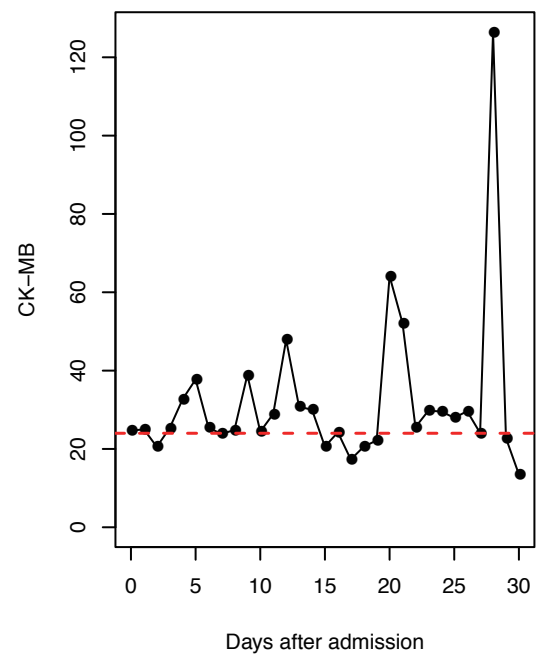**Survivors with CAD (0.884)**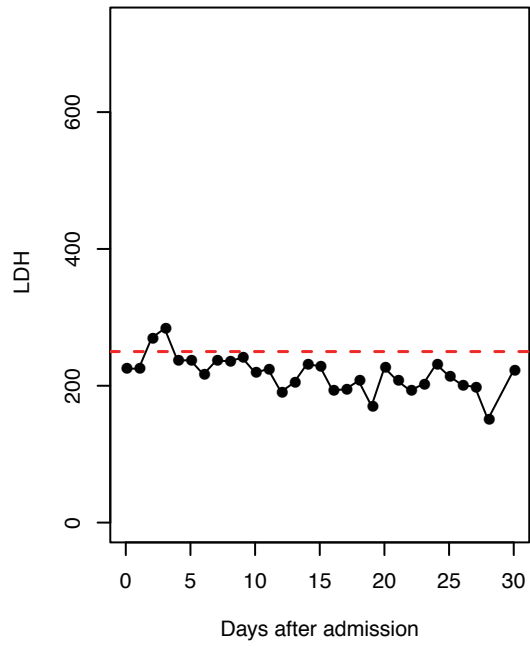**Non-survivors with CAD (1.44)**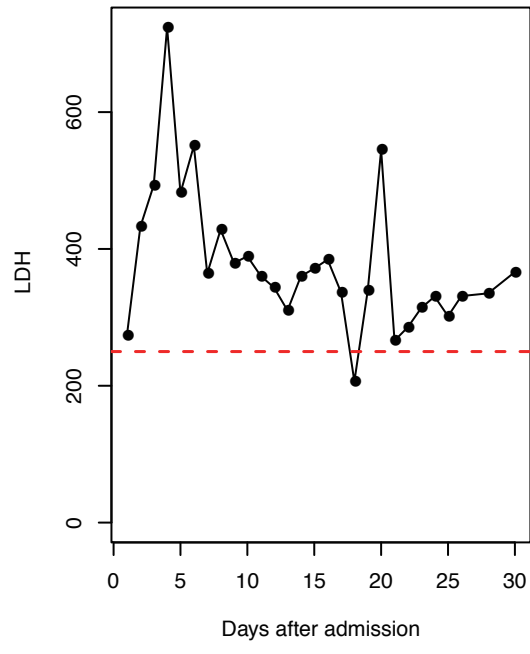**Survivors without CAD (0.842)**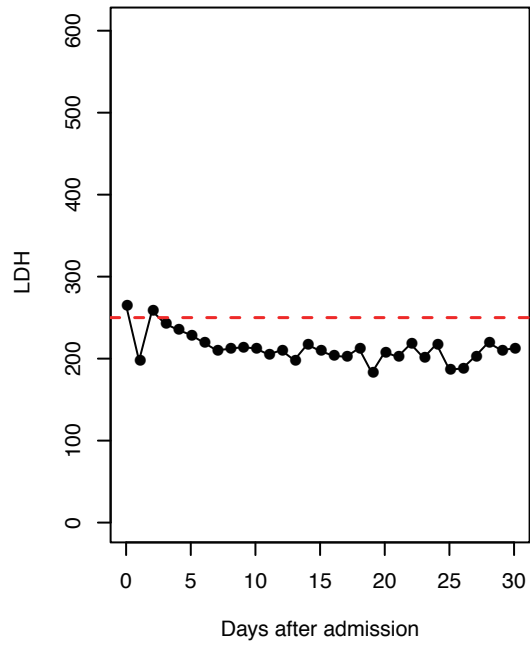**Non-survivors without CAD (1.74)**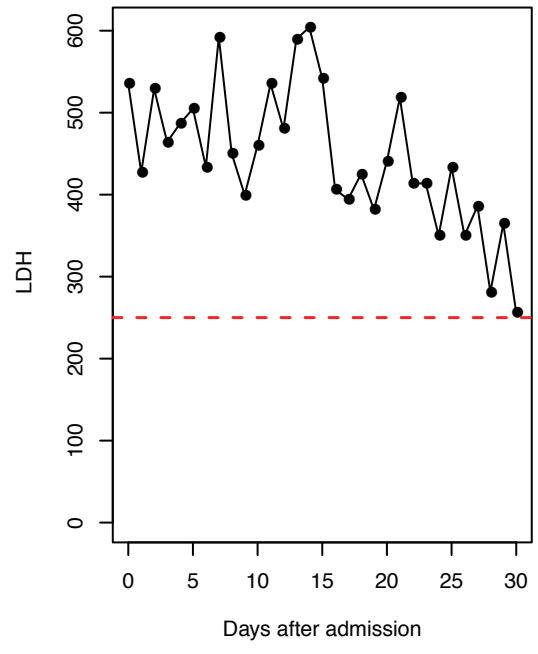

Supplement: 13054_2021_3555_MOESM4_ESM.pdf [file 13054_2021_3555_MOESM4_ESM.pdf]
