# Supplementary material
Source: PubMed Central journal article supplement (PMC8077943)
Supplement: 13054_2021_3555_MOESM2_ESM.pdf [file 13054_2021_3555_MOESM2_ESM.pdf]

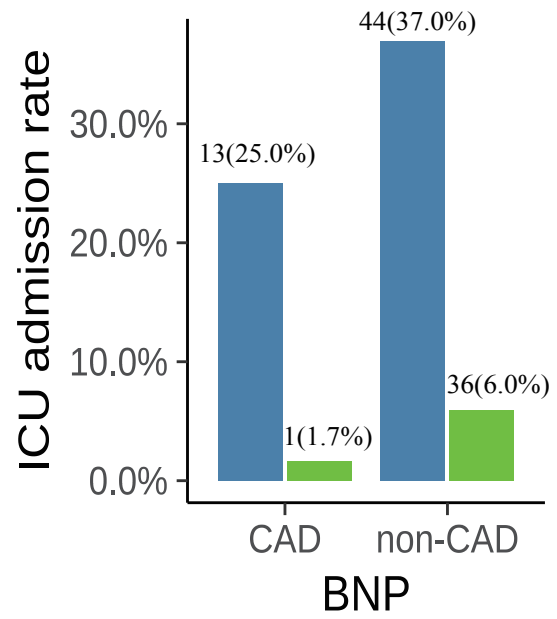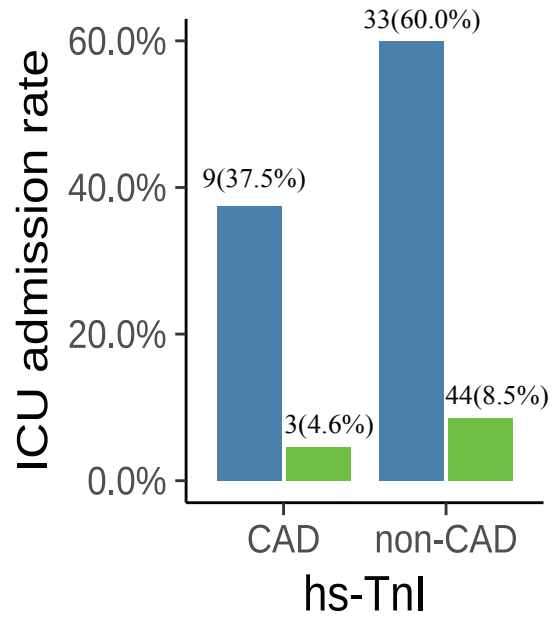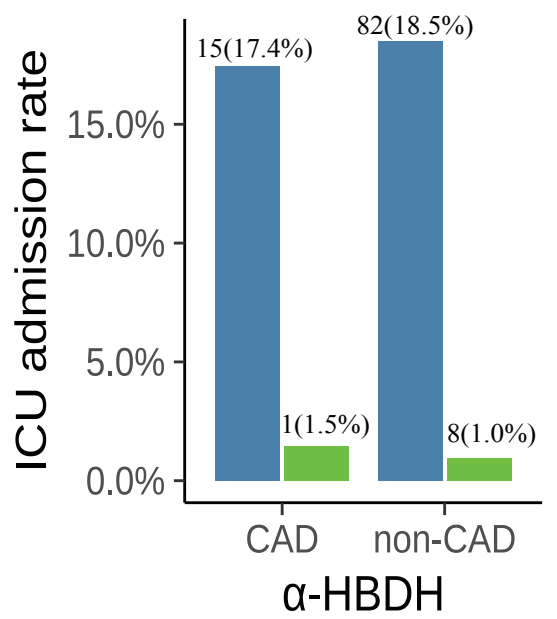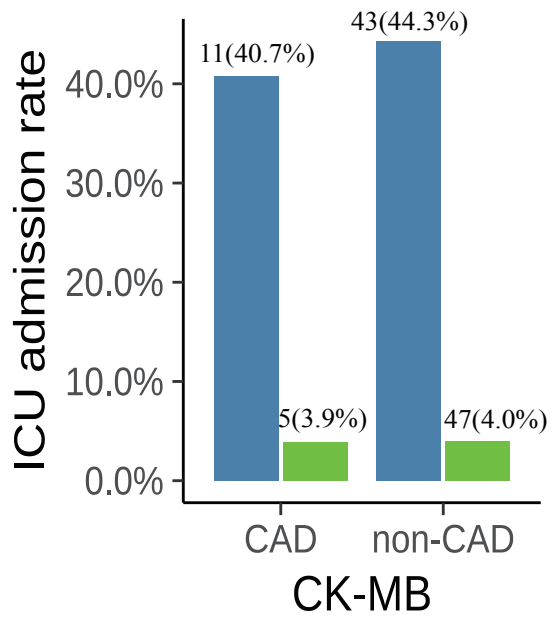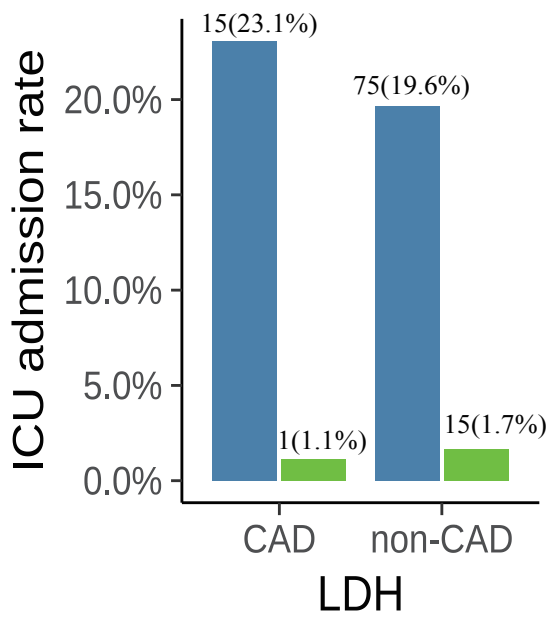

Abnormal Normal
