# Supplementary material
Source: PubMed Central journal article supplement (PMC8077943)
Supplement: 13054_2021_3555_MOESM3_ESM.pdf [file 13054_2021_3555_MOESM3_ESM.pdf]

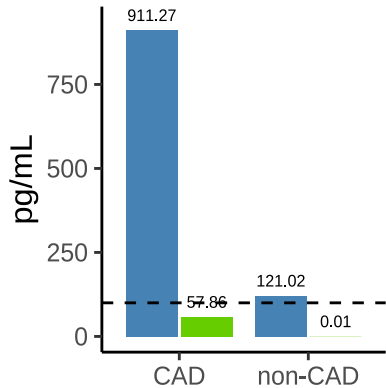

BNP

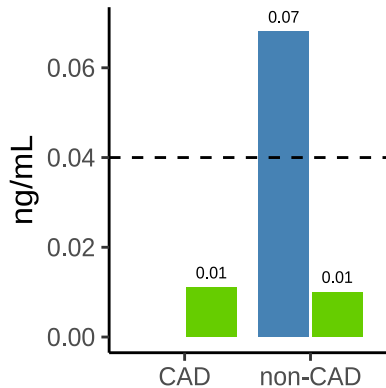

hs-Tnl

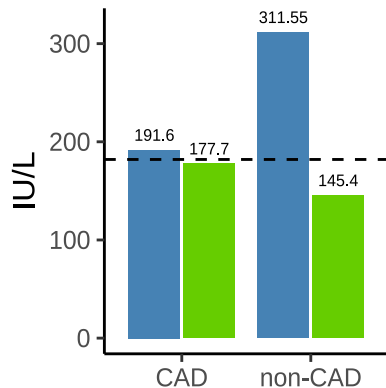

$\alpha$ -HBDH

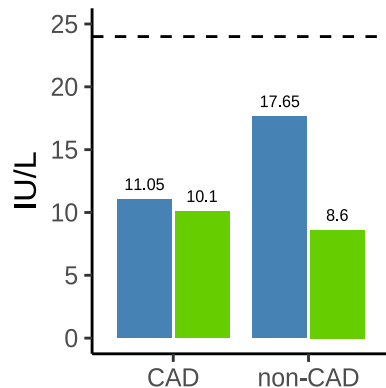

CK-MB

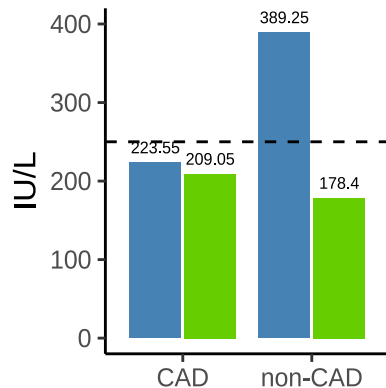

LDH

■ Non-survivors ■ Survivors
