# Supplementary material
Source: PubMed Central journal article supplement (PMC8077943)
Supplement: 13054_2021_3555_MOESM5_ESM.pdf [file 13054_2021_3555_MOESM5_ESM.pdf]

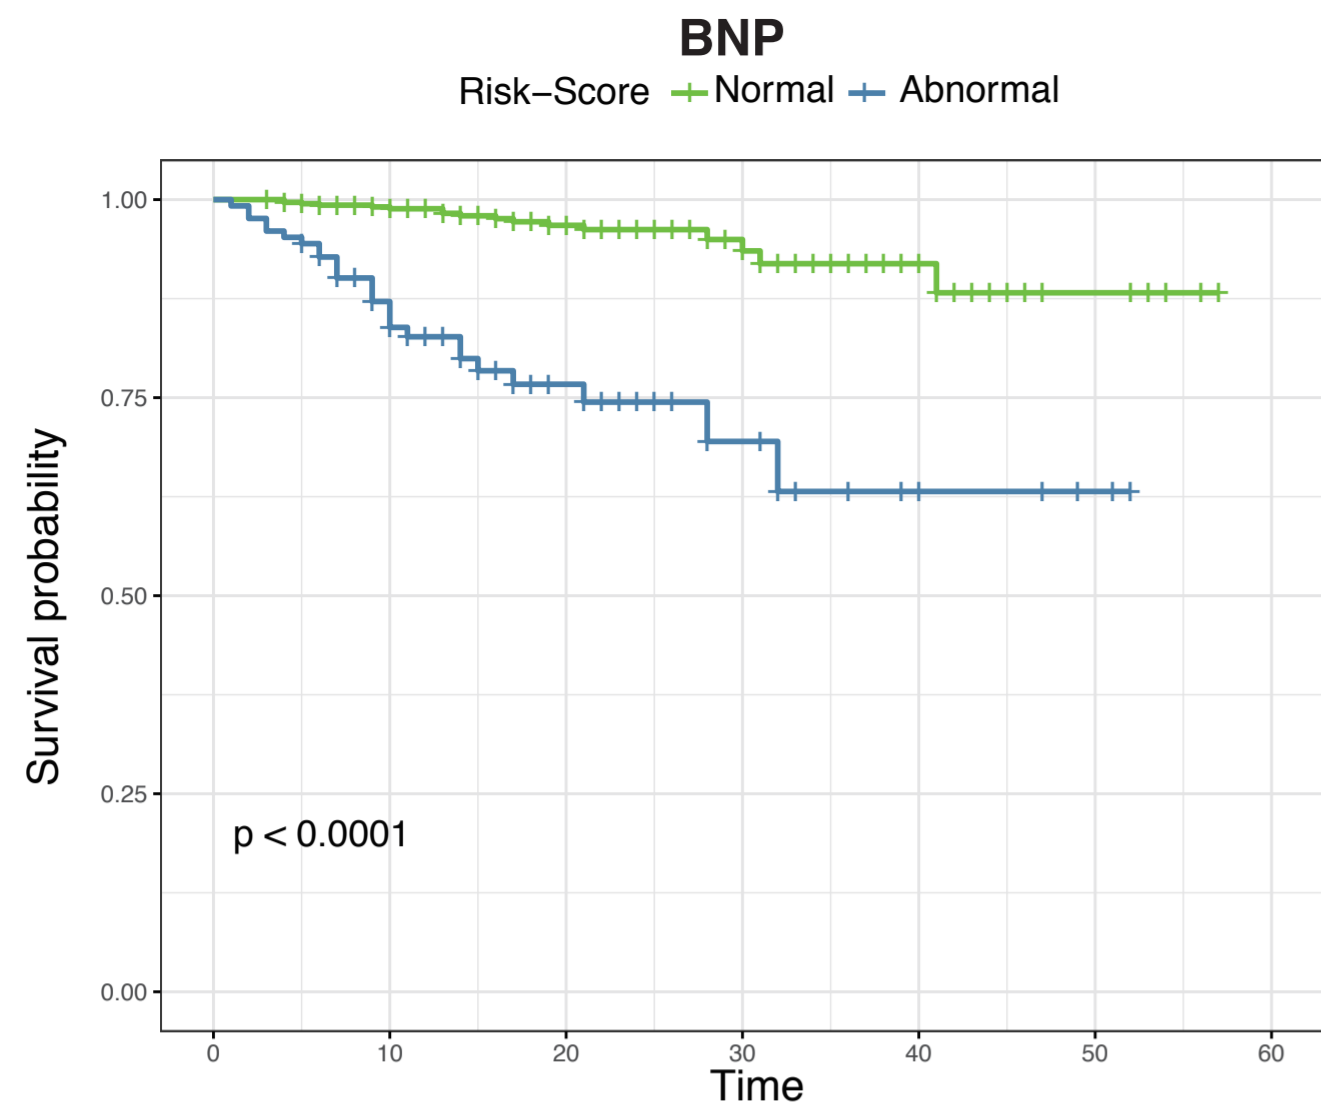

Number at risk

|          |     |     |     |    |    |   |   |
|----------|-----|-----|-----|----|----|---|---|
| Normal   | 581 | 425 | 202 | 66 | 27 | 8 | 0 |
| Abnormal | 125 | 80  | 34  | 12 | 5  | 2 | 0 |

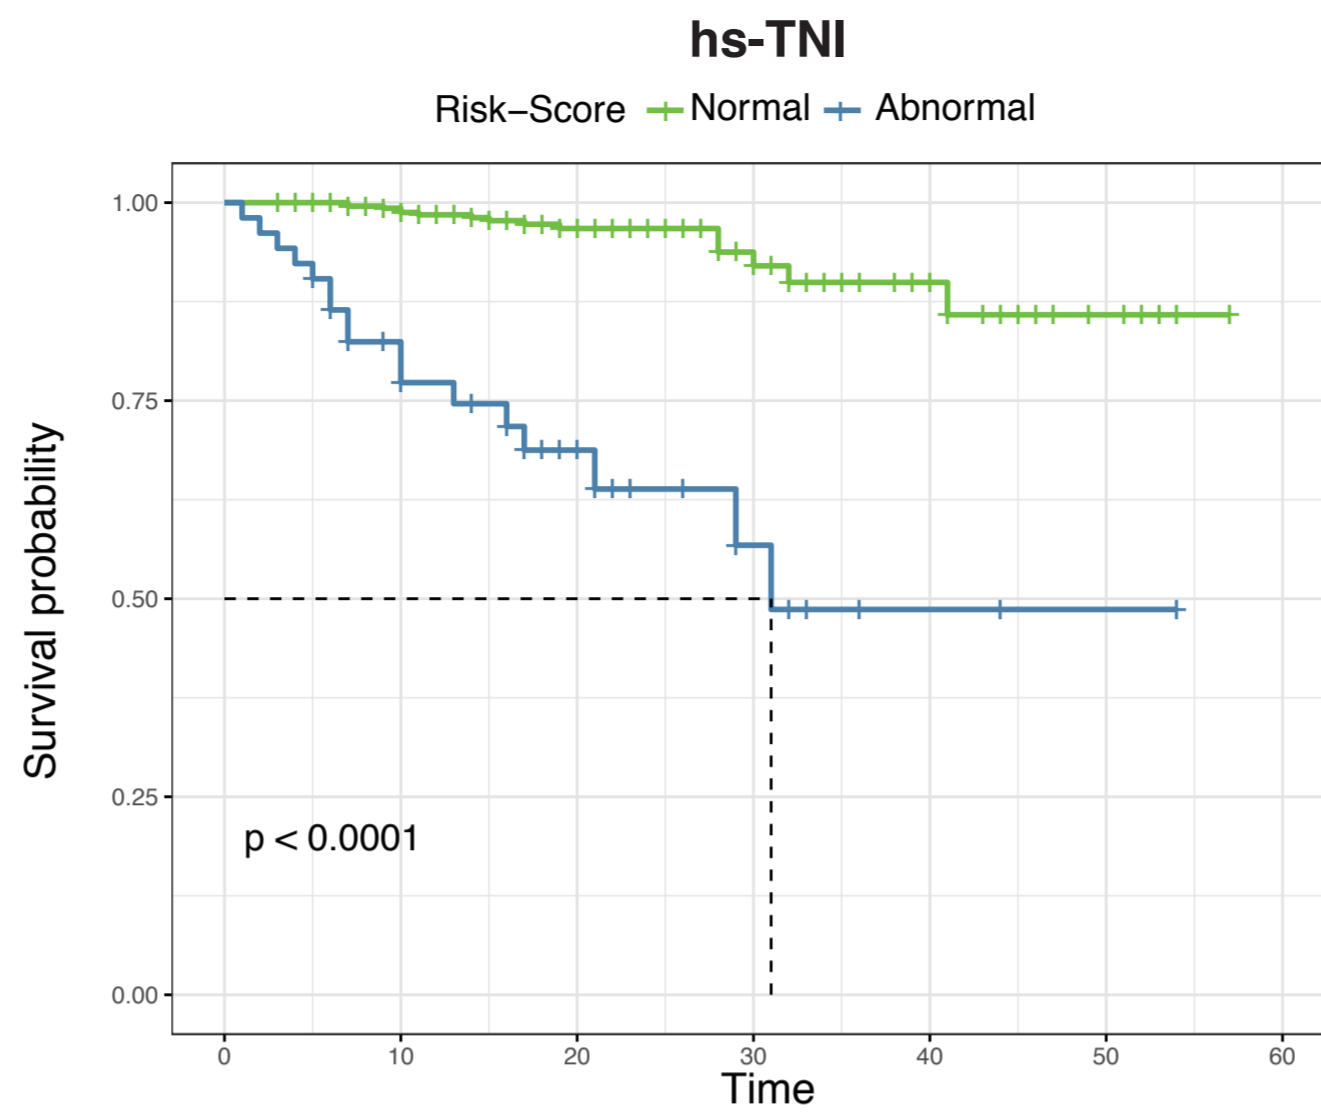

Number at risk

|          |     |     |     |    |    |   |   |
|----------|-----|-----|-----|----|----|---|---|
| Normal   | 499 | 364 | 169 | 54 | 23 | 6 | 0 |
| Abnormal | 52  | 32  | 16  | 7  | 2  | 1 | 0 |

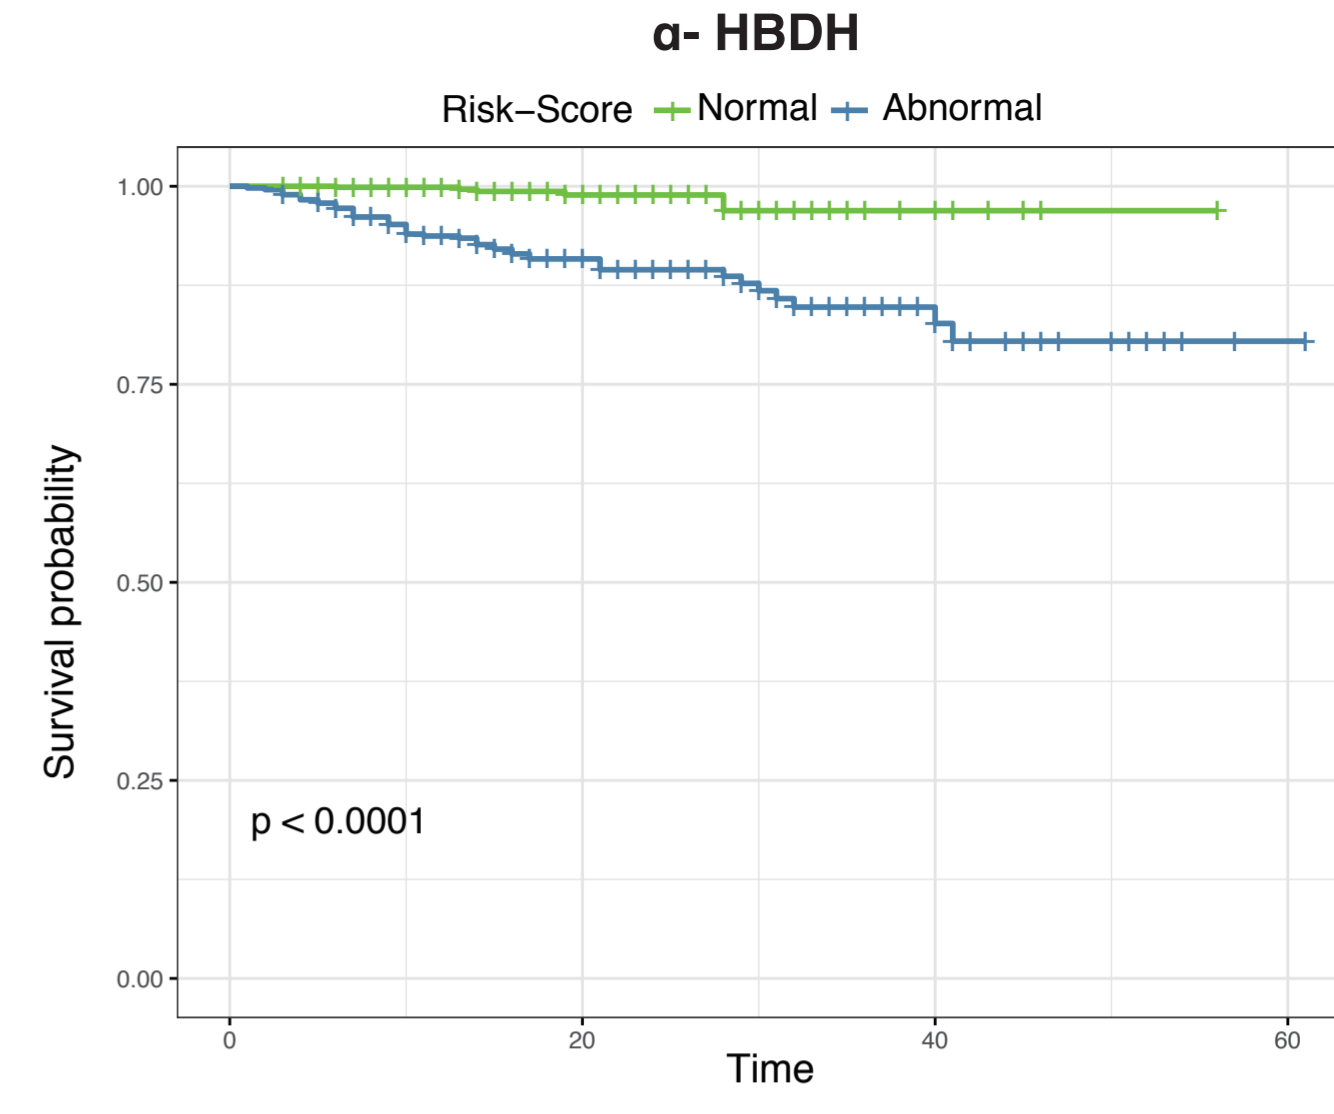

Number at risk

|          |     |     |    |   |
|----------|-----|-----|----|---|
| Normal   | 875 | 192 | 9  | 0 |
| Abnormal | 470 | 221 | 41 | 1 |

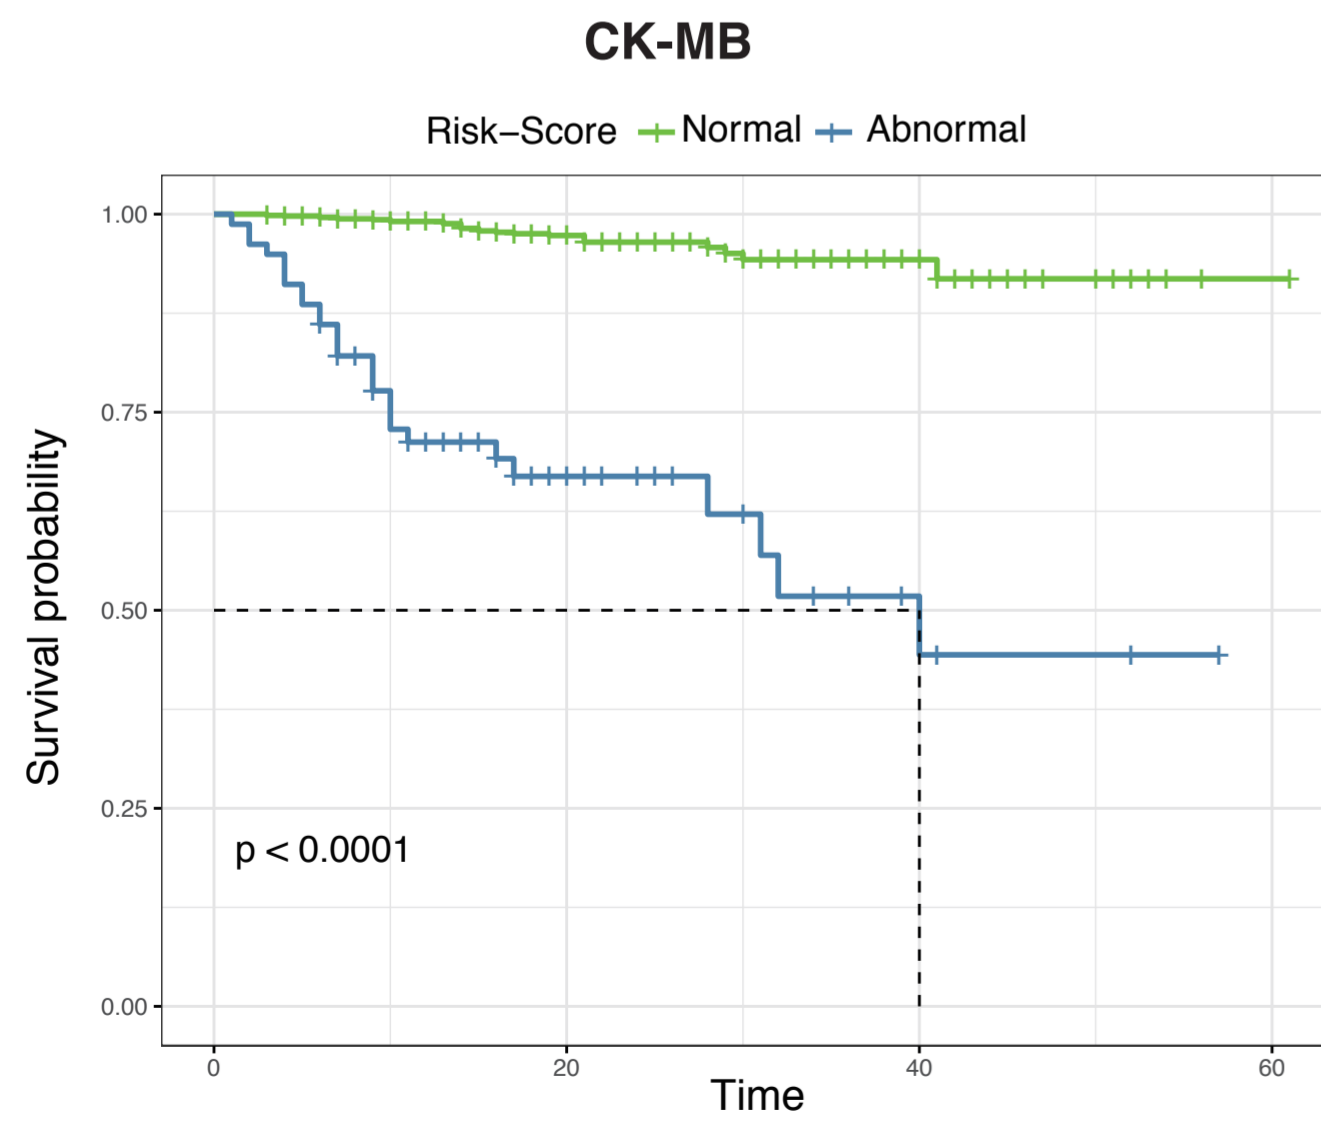

Number at risk

|          |      |     |    |   |
|----------|------|-----|----|---|
| Normal   | 1264 | 389 | 43 | 1 |
| Abnormal | 78   | 23  | 7  | 0 |

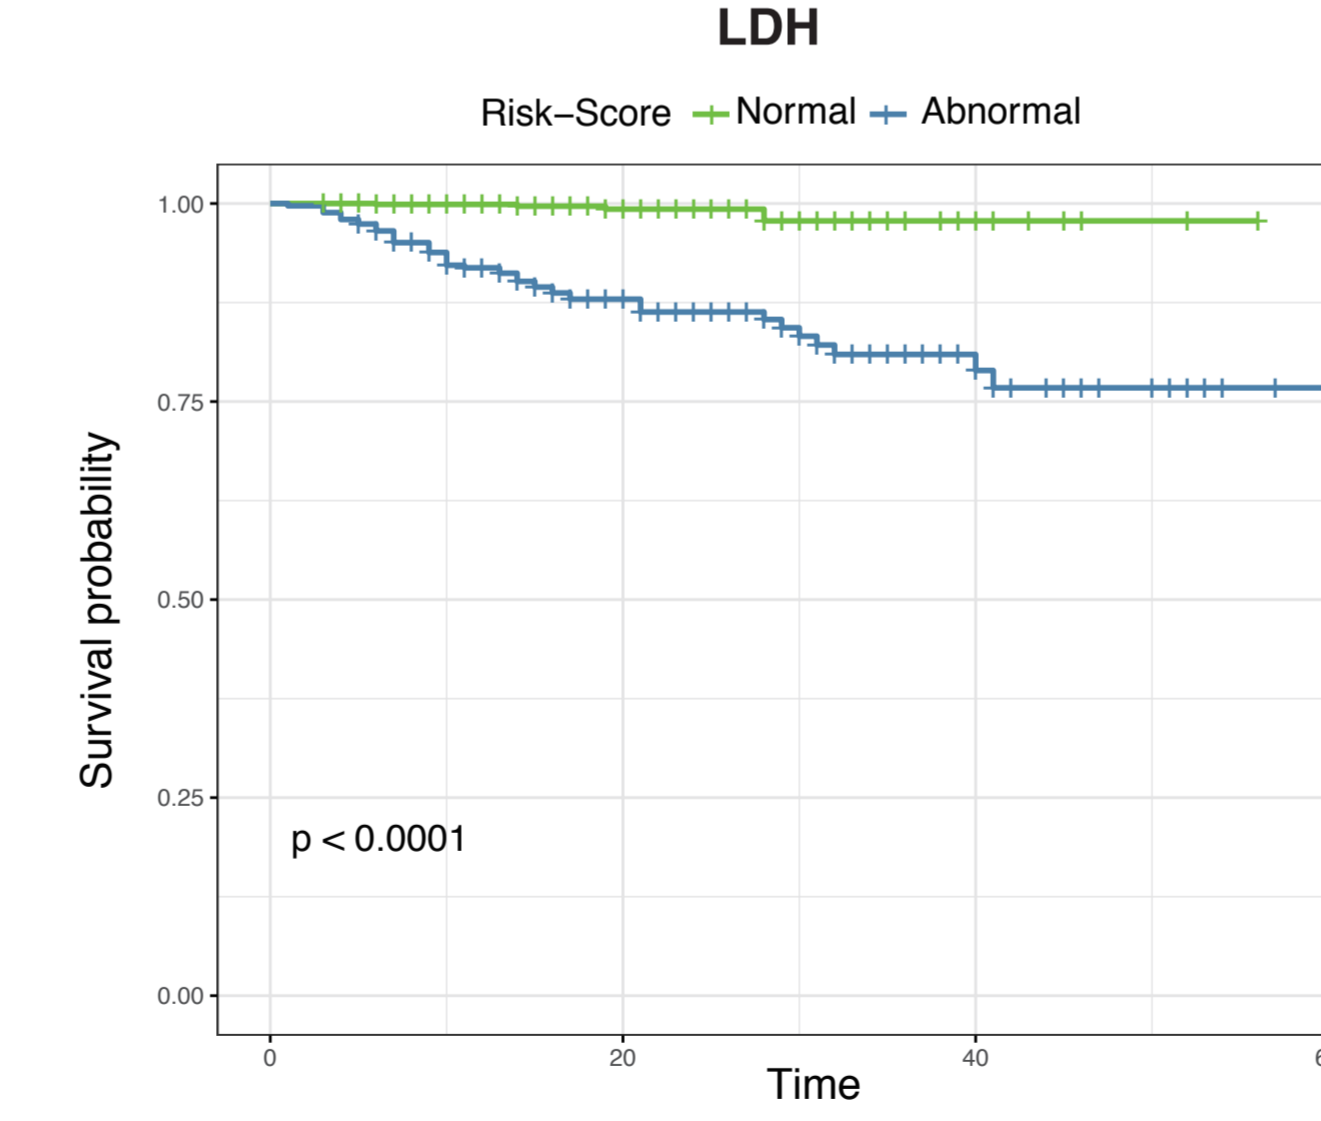

Number at risk

|          |     |     |    |   |
|----------|-----|-----|----|---|
| Normal   | 960 | 234 | 10 | 0 |
| Abnormal | 385 | 179 | 40 | 1 |
