# Supplementary material
Source: PubMed Central journal article supplement (PMC8077943)

**BNP**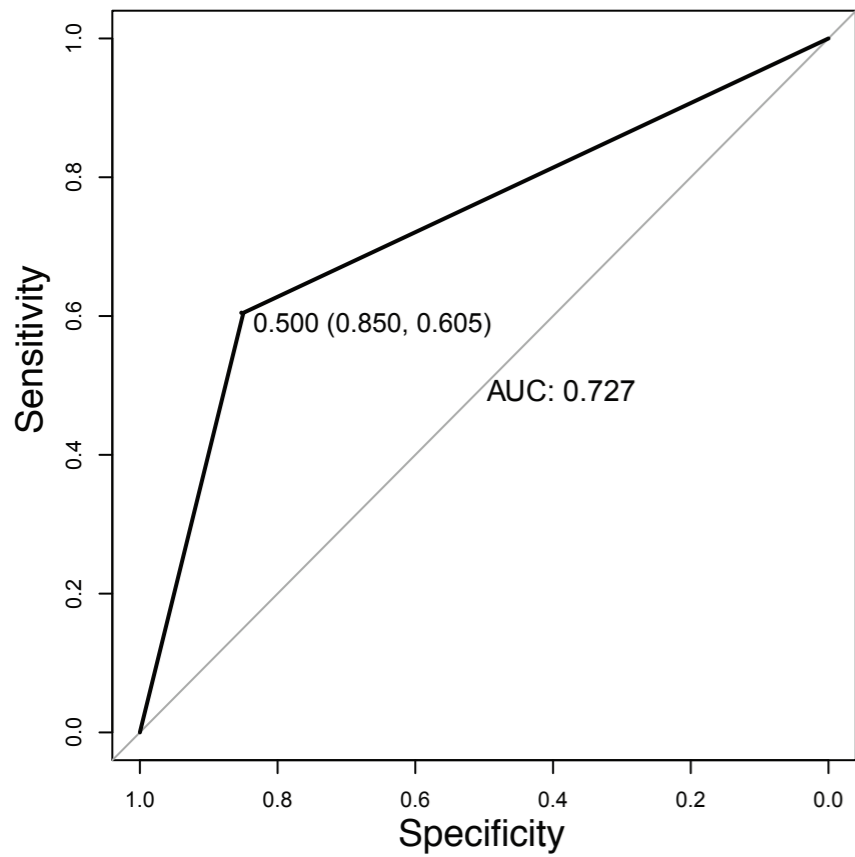**hs-TNI**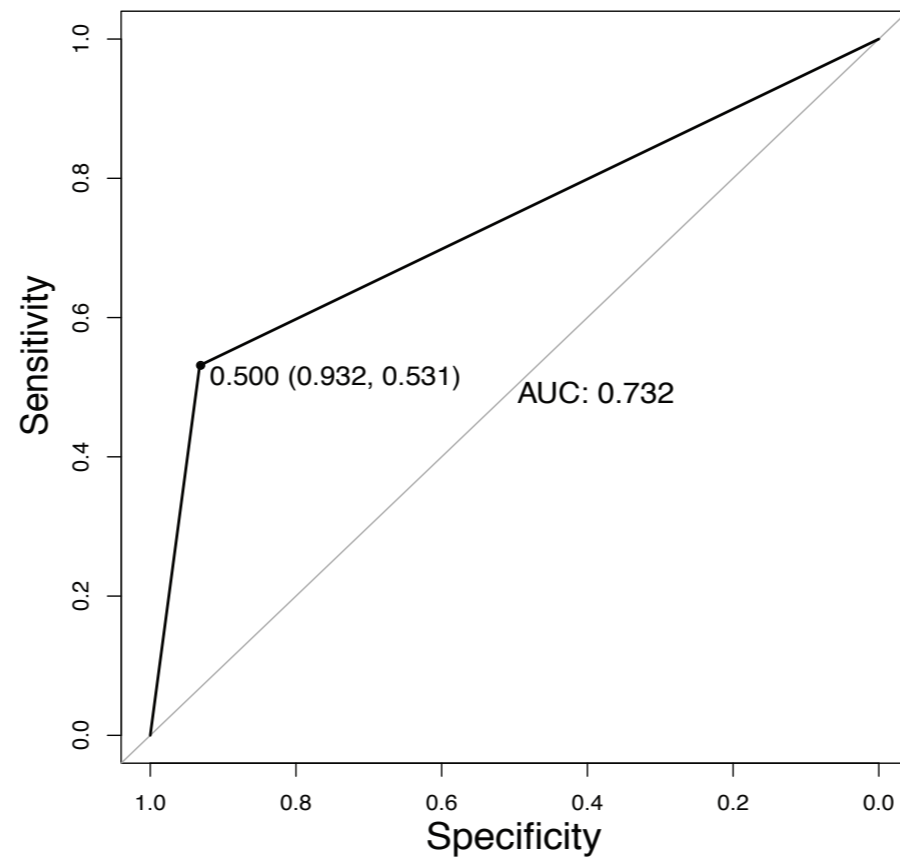 **$\alpha$ -HBDH**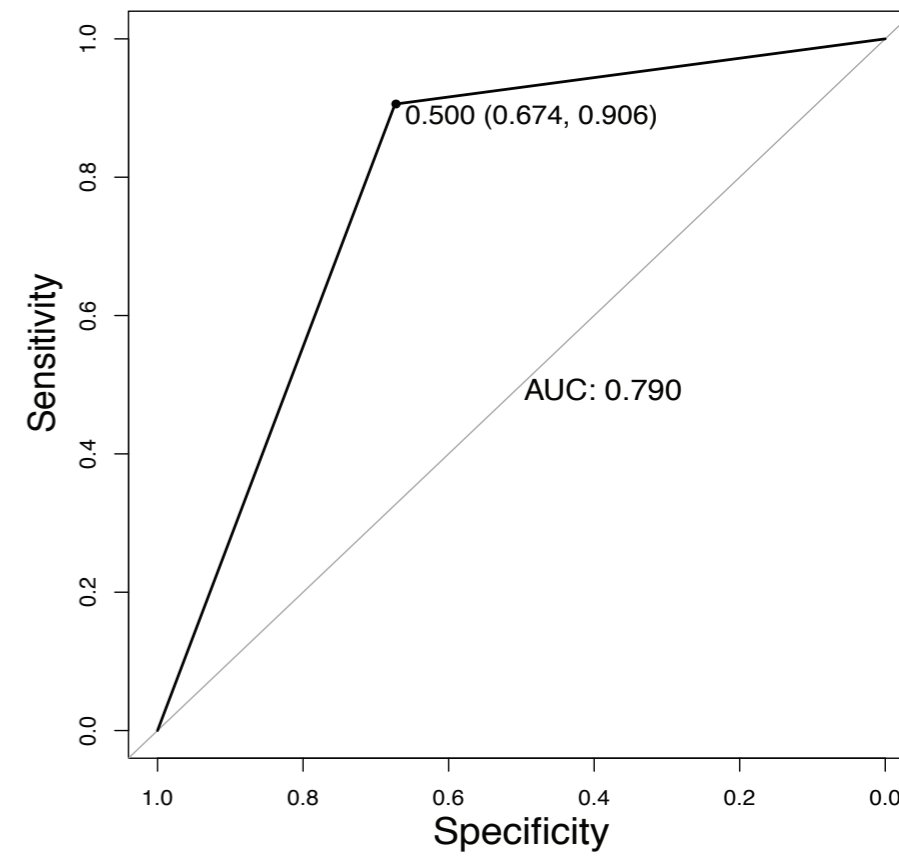**CK-MB**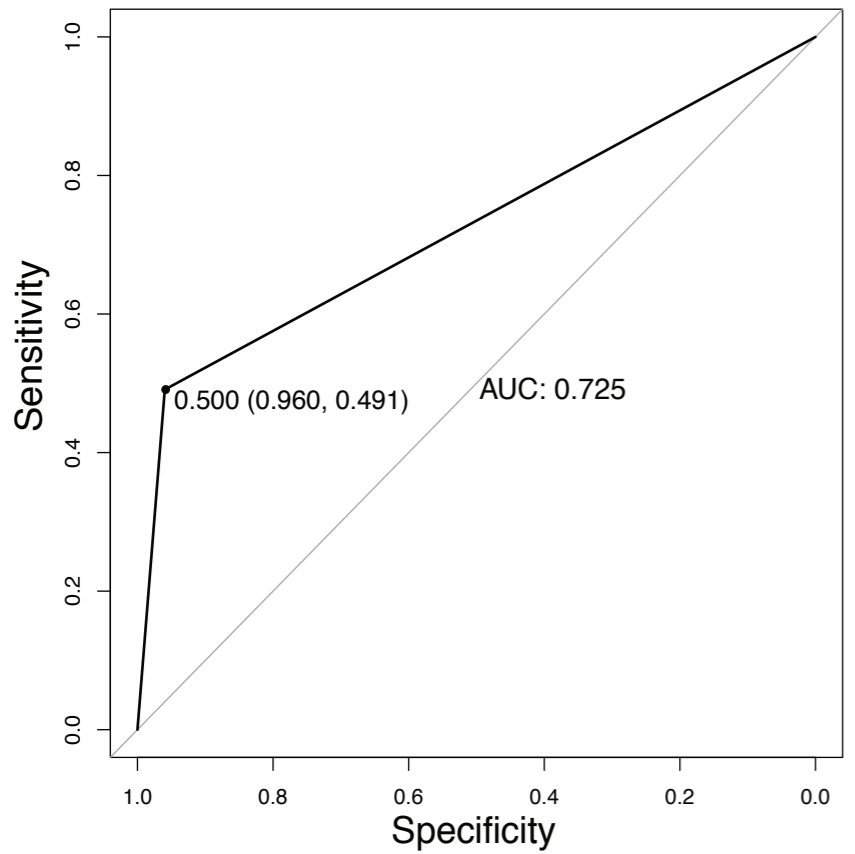**LDH**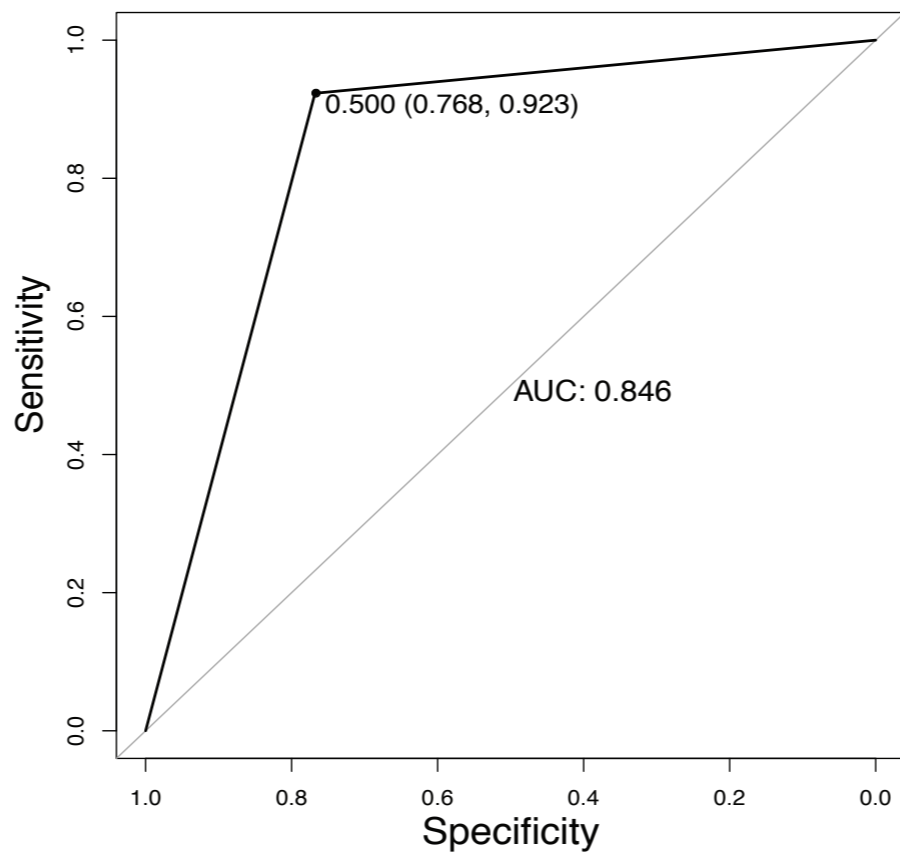

Supplement: 13054_2021_3555_MOESM6_ESM.pdf [file 13054_2021_3555_MOESM6_ESM.pdf]
